# Supplementary material for: Adipocyte-Specific Ablation of PU.1 Promotes Energy Expenditure and Ameliorates Metabolic Syndrome in Aging Mice
Source: Front Aging. 2022 Feb 2;2:803482. doi: 10.3389/fragi.2021.803482 (PMC9261351; doi:10.3389/fragi.2021.803482)
Supplement: Supplementary file 1 [file Table2.xlsx]

## Sheet: Glossary of terms
Term	Table	Definition
Aliases	1, 2, 3	Gene aliases
BioGRID	2	BioGRID-curated mouse Spi1/PU.1-interacting proteins
Category	1, 2, 3	SPP classification category - see text for details
Class	1, 2, 3	SPP classification class - see text for details
Family	1, 2, 3	SPP classification family - see text for details
Index	1, 2, 3	Identifier that sorts genes or proteins into categories, classes and families based upon SPP classification
Int P	2	Intersection P value
Int Q	2	Intersection P value incorporating correction for multiple hypothesis testing
Intersection	2	Number of high confidence transcriptional targets (HCTs) for a specific node in the gene set
Odds ratio	2	Ratio of observed to expected number of nodes
Rank	2	Genes are ranked initially by consensome p-value then by geometric mean fold change for genes with tied CPVs.
Symbol	1, 2, 3	MGI gene approved symbol
WAT %ile	2	Percentilized wild type white adipose tissue mean expression value
FC P	1	Fold change P value
FC Padj	1	Fold change P value incorporating correction for multiple hypothesis testing
Consensome P	3	The binomial probability of observing Eg or more successes out of Ng trials, when the true probability of success is 0.05. This provides an estimate of the degree to which the fraction of experiments with alterations exceed what might be expected by chance.
Consensome Q	3	Consensome P value incorporating correction for multiple hypothesis testing
GSEA Hallmark	3	Genes designated as hallmark adipogenesis-induced transcripts by GSEA
Discovery rate	3	For each gene, g, in the consensome, we counted the number of experiments, Eg, where the gene has a nominal p-value of 0.05 or less out of Ng experiments where gene-specific data are present. The discovery rate (DR) was calculated as Eg/Ng.
Number of expts	3	Number of experiments in which gene-specific data were present.
THERMO	2	Genes mapping to the MPO terms “decreased brown adipose tissue amount”, “decreased core body temperature” or “impaired adaptive thermogenesis”
ACL	2	Genes mapping to the MPO term “abnormal cytokine levels"
AEE	2	Genes mapping to the MPO term "abnormal energy expenditure”
IGT	2	Genes mapping to the MPO term “impaired glucose tolerance”
Lazar	3	Genes in the 50th percentile of MACS2 peak heights from the PU.1 3T3-L1 ChIP-Seq analysis by Lazar and colleagues

## Sheet: Table S2
Table S2. Signaling pathway node ChIP-Seq HCT intersection analysis (P<0.05)
	Signaling pathway node ChIP-Seq consensome						aPU.1KO v WT 1.5 fold up q<0.05				aPU.1KO v WT 1.5 fold down q<0.05						MAMMALIAN PHENOTYPE ONTOLOGY TERMS
	ID	Category	Class	Family	Symbol	Aliases	Intersection	Odds ratio	Int P	Int Q	Intersection	Odds ratio	Int P	Int Q	WAT %ile	BioGRID	AEE	THERMO	ACL	IGT
	ID	Category	Class	Family	Symbol	Aliases	Intersection	Odds ratio	Int P	Int Q	Intersection	Odds ratio	Int P	Int Q	WAT %ile	BioGRID	AEE	THERMO	ACL	IGT
	1	Receptors	Catalytic receptors	Fibroblast growth factor receptors	Fgfr1	H2, H3, H4, H5, CEK, FLG, BFGFR, N-SAM, CD331					71	1.43461	0.00367545	0.0193593	92.1348
	2	Receptors	Nuclear receptors	Androgen receptor	Ar	AIS, NR3C4, SMAX1, HUMARA					42	1.50227	0.0106335	0.0499122	75.2809					▪
	3	Receptors	Nuclear receptors	DAX-like receptors	Nr0b1	DAX1, AHCH	11	1.92233	0.0352486	0.290899	37	1.75345	0.00173028	0.00994908
	4	Receptors	Nuclear receptors	DAX-like receptors	Nr0b2	SHP	4	3.85691	0.0237445	0.230757	18	5.57398	8.25562e-08	1.0357e-06			▪
	5	Receptors	Nuclear receptors	Estrogen receptors	Esr1	NR3A1, Era, ER-alpha	22	1.62489	0.0244004	0.233837	74	1.46028	0.00208518	0.0116973	55.0562		▪			▪
	6	Receptors	Nuclear receptors	Estrogen-related receptors	Esrra	ERR1, ERRalpha, NR3B1, ERRa	18	2.00467	0.00627529	0.122632					52.2472		▪	▪
	7	Receptors	Nuclear receptors	Estrogen-related receptors	Esrrb	ERR2, ERRbeta, NR3B2, ERRb					67	1.66351	0.000156498	0.00109074
	8	Receptors	Nuclear receptors	Fushi tarazu F1-like receptors	Nr5a1	FTZ1, SF-1, ELP, AD4BP, hSF-1, SF1	5	2.7683	0.03989	0.309259					0.561798
	9	Receptors	Nuclear receptors	Glucocorticoid receptor	Nr3c1	GR	38	2.89751	5.087e-08	1.22047e-05	86	1.69217	1.30009e-05	0.000115008	94.9438				▪
	10	Receptors	Nuclear receptors	Hepatocyte nuclear factor-4 receptors	Hnf4a	NR2A1, HNF4	27	2.41423	6.96176e-05	0.00533735	86	2.09366	4.93418e-09	7.40127e-08						▪
	11	Receptors	Nuclear receptors	Hepatocyte nuclear factor-4 receptors	Hnf4g	NR2A2	12	2.19268	0.0121088	0.149197	38	1.88613	0.000455261	0.00296349			▪
	12	Receptors	Nuclear receptors	Liver X receptors	Nr1h2	NER, NER-I, RIP15, LXR-b, LXRb	19	1.94881	0.00675367	0.122632	81	2.34261	1.40291e-10	2.48207e-09	52.809
	13	Receptors	Nuclear receptors	NGFBI-like (NR4A) receptors	Nr4a1	TR3, N10, NAK-1, NGFIB, NUR77					105	2.2884	1.35542e-12	3.01689e-11	92.6966
	14	Receptors	Nuclear receptors	Peroxisome proliferator-activated receptors	Ppara	hPPAR, NR1C1	25	2.38187	0.000150249	0.00863929	67	1.68999	0.000104345	0.000774176	20.2247		▪	▪		▪
	15	Receptors	Nuclear receptors	Peroxisome proliferator-activated receptors	Pparg	PPARG1, PPARG2, NR1C3, PPARgamma	41	3.29536	5.46484e-10	3.77074e-07					94.382		▪	▪		▪
	16	Receptors	Nuclear receptors	Progesterone receptor	Pgr	PR, NR3C3	24	2.10786	0.0010148	0.0432623
	17	Receptors	Nuclear receptors	Retinoid X receptors	Rxra	NR2B1	33	2.29753	3.22455e-05	0.00278117					95.5056
	18	Receptors	Nuclear receptors	Rev-Erb receptors	Nr1d1	ear-1, hRev, Rev-ErbAalpha, THRA1, REVERBA, REVERBalpha	31	2.9199	6.26058e-07	0.000107995					88.764
	19	Receptors	Nuclear receptors	Rev-Erb receptors	Nr1d2	BD73, RVR, EAR-1r, HZF2, Hs.37288, REVERBB, REVERBbeta					30	2.29222	9.22544e-05	0.000699511	74.1573
	20	Receptors	Nuclear receptors	Thyroid hormone receptors	Thrb	THRB1, THRB2, NR1A2, THR1, ERBA-BETA, GRTH	1	31.661	0.0459783	0.322973					51.1236
	21	Enzymes	Acetyltransferases	CBP/p300	Crebbp	RTS, CBP, KAT3A	20	1.5377	0.0477931	0.323306					68.5393	▪	▪		▪	▪
	22	Enzymes	Acetyltransferases	CBP/p300	Ep300	p300, KAT3B					135	2.71548	7.0644e-21	4.4313e-19	66.2921	▪
	23	Enzymes	Acetyltransferases	Chromodomain Y like	Cdyl	DKFZP586C1622, CDYL1	9	3.00273	0.00444055	0.0988381					26.9663
	24	Enzymes	Deacetylases	Histone deacetylases (HDAC)	Hdac3	RPD3, HD3, RPD3-2, KDAC3	21	1.7635	0.0127751	0.154645	69	1.55179	0.000719022	0.00451023	58.9888
	25	Enzymes	Deacetylases	Sirtuins (SIRT)	Sirt1	SIR2L1					47	3.2815	8.32909e-11	1.51239e-09	53.3708		▪			▪
	26	Enzymes	Deacetylases	Sirtuins (SIRT)	Sirt7		1	31.661	0.0459783	0.322973					33.1461				▪
	27	Enzymes	Demethylases	Histone-H3-lysine-36 demethylases (KDM)	Kdm2b	PCCX2, CXXC2, Fbl10, JHDM1B	21	1.86829	0.00720406	0.124277	58	1.35586	0.0200146	0.0852472	34.8315
	28	Enzymes	Demethylases	Histone-H3-lysine-36 demethylases (KDM)	Kdm4a	KIAA0677, JHDM3A, TDRD14A	7	2.23166	0.0440532	0.322973					65.1685
	29	Enzymes	Demethylases	Histone-H3-lysine-36 demethylases (KDM)	Kdm4d	FLJ10251	1	31.661	0.0459783	0.322973
	30	Enzymes	Demethylases	Histone-H3-lysine-36 demethylases (KDM)	Kdm5c	DXS1272E, XE169	3	3.89008	0.0472757	0.322973					72.4719
	31	Enzymes	Demethylases	Jumonji domain containing	Jmjd6	PTDSR1, KIAA0585					28	2.70397	1.17885e-05	0.000105637	32.0225
	32	Enzymes	Dioxygenases	Ten-eleven translocation (TET)	Tet1	LCX, KIAA1676, bA119F7.1	22	1.79398	0.00931661	0.128569					5.61798
	33	Enzymes	Dioxygenases	Ten-eleven translocation (TET)	Tet3	MGC22014, hCG_40738	18	2.19375	0.00261022	0.0776233					73.5955
	34	Enzymes	E3 ubiquitin ligases	BRCA1	Brca1	RNF53, BRCC1, PPP1R53, FANCS	2	8.46209	0.0281811	0.255855					13.4831
	35	Enzymes	E3 ubiquitin ligases	RING finger (RNF) E3 ubiquitin ligases	Rnf2	BAP-1, BAP1, DING, HIPI3, RING1B, RING2	22	1.65222	0.0208994	0.214411	105	2.23672	4.49622e-12	9.69498e-11	54.4944
	36	Enzymes	E3 ubiquitin ligases	Tripartite motif-containing (TRIM)	Trim28	TIF1B, KAP1, TF1B, RNF96, PPP1R157	20	1.80324	0.0119625	0.149197					67.9775
	37	Enzymes	E3 ubiquitin ligases	Tripartite motif-containing (TRIM)	Trim33	TIF1GAMMA, FLJ11429, KIAA1113, TIFGAMMA, RFG7, TF1G, TIF1G, PTC7					94	2.71501	3.18732e-15	1.04726e-13	57.3034	▪
	38	Enzymes	Helicases (DNA)	ATRX chromatin remodeler	Atrx	XH2, XNP	20	1.95427	0.00544024	0.11375					84.2697
	39	Enzymes	Kinases	Cyclin-dependent kinases (CDK)	Cdk8	K35					37	1.47229	0.0199976	0.0852472	50
	40	Enzymes	Methyltransferases	ASH like methyltransferase	Ash1l	huASH1, ASH1, ASH1L1, KMT2H	1	63.3835	0.0308915	0.266439					85.3933				▪
	41	Enzymes	Methyltransferases	Euchromatic histone-lysine N-methyltransferases (EHMT)	Ehmt2	G9A, Em:AF134726.3, NG36/G9a, KMT1C	8	2.99248	0.00720445	0.124277					80.3371
	42	Enzymes	Methyltransferases	Histone-lysine N-methyltransferases (KMT)	Kmt2a	TRX1, HRX, ALL-1, HTRX1, CXXC7, MLL1A	17	1.78815	0.0203895	0.213163					67.4157
	43	Enzymes	Methyltransferases	Histone-lysine N-methyltransferases (KMT)	Kmt2c	KIAA1506, HALR	21	1.75179	0.0136207	0.162039	76	1.7212	2.29648e-05	0.000198071	77.5281
	44	Enzymes	Methyltransferases	SET domain-containing (SETD)	Setdb1	KG1T, KIAA0067, ESET, KMT1E, TDRD21	10	2.18368	0.0211304	0.214411					44.9438
	45	Enzymes	Other enzymes	Recombination activating	Rag1	RNF74, MGC43321					44	1.35744	0.0369256	0.147276
	46	Enzymes	Recombinases	DNA meiotic recombinases	Dmc1	LIM15					62	1.3244	0.0247459	0.103483
	47	Enzymes	Regulatory factors	G protein pathway suppressor	Gps2						49	1.84723	0.000125253	0.000909732	28.0899
	48	Enzymes	Topoisomerases	DNA topoisomerases (TOP)	Top2b		2	12.6965	0.0143935	0.16365					90.4494
	49	Transcription factors	ARID domain	JARID2	Jarid2		21	2.36278	0.000516087	0.0273923	70	2.16298	3.69508e-08	4.90309e-07	49.4382
	50	Transcription factors	BHLH factors	Achaete-Scute-like factor	Ascl1	ASH1, HASH1, bHLHa46					69	1.65294	0.000150275	0.00105806	6.17978
	51	Transcription factors	BHLH factors	Ahr-like family	Ahr	bHLHe76					38	1.55591	0.00897359	0.0427019	20.7865				▪
	52	Transcription factors	BHLH factors	Ahr-like family	Npas3	MOP6, PASD6, bHLHe12	14	1.97061	0.0163441	0.179007
	53	Transcription factors	BHLH factors	Arnt-like factors	Arntl	MOP3, JAP3, BMAL1, PASD3, bHLHe5	27	3.00483	1.82693e-06	0.000210097					17.9775		▪			▪
	54	Transcription factors	BHLH factors	Arnt-like factors	Clock	KIAA0334, KAT13D, bHLHe8	29	3.45673	5.3064e-08	1.22047e-05					81.4607		▪			▪
	55	Transcription factors	BHLH factors	E2A-related factor	Tcf12	HEB, HTF4, HsT17266, bHLHb20, p64					78	1.56844	0.00026539	0.00179529	71.9101
	56	Transcription factors	BHLH factors	E2A-related factor	Tcf3	E2A, ITF1, MGC129647, MGC129648, bHLHb21, VDIR, E47, p75					107	2.32849	3.32382e-13	7.64479e-12	38.2022
	57	Transcription factors	BHLH factors	E2A-related factor	Tcf4	SEF2-1B, ITF2, bHLHb19, E2-2					68	2.15704	6.20164e-08	7.92431e-07	87.0787
	58	Transcription factors	BHLH factors	Hairy-related	Bhlhe41	DEC2, SHARP-1, SHARP1	9	2.88185	0.00570628	0.115804					46.0674
	59	Transcription factors	BHLH factors	Myogenic transcription factor	Myf5	bHLHc2					64	1.83573	1.67279e-05	0.000146105
	60	Transcription factors	BHLH factors	Myogenic transcription factor	Myod1	PUM, MYOD, bHLHc1					95	2.22672	5.08693e-11	9.48644e-10
	61	Transcription factors	BHLH factors	Myogenic transcription factor	Myog	bHLHc3					72	1.81563	7.59647e-06	7.08319e-05
	62	Transcription factors	BHLH factors	Neurogenin-Atonal like	Neurod1	BETA2, BHF-1, NeuroD, bHLHa3, MODY6					67	1.64545	0.000206105	0.00140805
	63	Transcription factors	BHLH factors	Neurogenin-Atonal like	Neurod2	NDRF, bHLHa1					87	2.00904	2.17429e-08	3.06175e-07
	64	Transcription factors	BHLH factors	Neurogenin-Atonal like	Neurog2	Atoh4, Math4A, ngn-2, bHLHa8, NGN2					88	2.05413	7.39172e-09	1.08517e-07
	65	Transcription factors	BHLH factors	Neurogenin-Atonal like	Olig2	RACK17, OLIGO2, bHLHe19					65	1.49459	0.0022423	0.0124773
	66	Transcription factors	BHLH factors	SREBP factor	Srebf1	SREBP1, bHLHd1, SREBP-1c, SREBP1a	18	1.63211	0.036823	0.295441	61	1.48133	0.00352633	0.0188617	96.6292
	67	Transcription factors	BHLH factors	Tal/HEN-like	Lyl1	bHLHa18					32	4.75545	3.18158e-11	6.09802e-10	14.0449
	68	Transcription factors	BHLH factors	Tal/HEN-like	Tal1	SCL, bHLHa17					66	1.97363	1.53051e-06	1.55302e-05	17.4157
	69	Transcription factors	BHLH factors	TFE3-like factor	Mitf	MI, bHLHe32					20	2.21616	0.00176274	0.010052	42.6966
	70	Transcription factors	BHLH factors	Twist-like factor	Hand2	dHand, Thing2, Hed, bHLHa26					74	1.90461	1.27198e-06	1.34187e-05
	71	Transcription factors	BZIP factors	ATF-2-like factors	Atf3						131	4.21484	1.40508e-35	3.23168e-33	86.5169		▪
	72	Transcription factors	BZIP factors	ATF-4-related factor	Atf4	TAXREB67, CREB-2					30	1.43739	0.0420044	0.165617	83.7079					▪
	73	Transcription factors	BZIP factors	B-ATF-related factor	Batf	B-ATF, SFA-2, BATF1					100	2.51612	3.04403e-14	8.40152e-13	3.93258
	74	Transcription factors	BZIP factors	B-ATF-related factor	Batf3	JUNDM1, SNFT, JDP1					62	4.1857	7.10919e-18	3.27023e-16	6.74157
	75	Transcription factors	BZIP factors	C/EBP	Cebpa	C/EBP-alpha	35	2.61943	1.39105e-06	0.000191965	67	1.26273	0.0444002	0.173085	99.4382		▪	▪		▪
	76	Transcription factors	BZIP factors	C/EBP	Cebpb	LAP, CRP2, NFIL6, IL6DBP, C/EBP-beta	24	1.74756	0.00925	0.128569	87	1.71929	6.86395e-06	6.48784e-05	64.6067			▪	▪
	77	Transcription factors	BZIP factors	C/EBP	Cebpd	CRP3, CELF, C/EBP-delta, NF-IL6-beta					70	3.81192	4.30563e-18	2.12206e-16	37.6404				▪
	78	Transcription factors	BZIP factors	C/EBP	Cebpe	CRP1					54	2.44598	3.64175e-08	4.90309e-07
	79	Transcription factors	BZIP factors	Fos factor	Fos	c-fos, AP-1					70	1.73834	3.46882e-05	0.000288372	98.8764				▪
	80	Transcription factors	BZIP factors	Fos factor	Fosl1	fra-1					102	2.61841	1.90369e-15	6.9134e-14	7.30337				▪	▪
	81	Transcription factors	BZIP factors	Fos factor	Fosl2	FRA2, FLJ23306					63	1.77722	4.54105e-05	0.000368626	83.1461					▪
	82	Transcription factors	BZIP factors	Jun factor	Jun	c-Jun, AP-1					149	3.71153	8.67803e-35	1.49696e-32	98.3146	▪			▪
	83	Transcription factors	BZIP factors	Jun factor	Junb						144	4.39721	1.51348e-40	1.0443e-37	97.191				▪
	84	Transcription factors	BZIP factors	Jun factor	Jund	AP-1					100	2.26184	7.79997e-12	1.6309e-10	82.5843
	85	Transcription factors	BZIP factors	Large Maf factor	Maf	c-MAF					47	2.34499	7.41755e-07	8.12398e-06	73.0337
	86	Transcription factors	BZIP factors	Large Maf factor	Mafb						74	4.32929	1.12857e-21	7.78714e-20	58.427
	87	Transcription factors	BZIP factors	NF-E2-like factor	Bach2	BTBD25					69	2.17702	3.66517e-08	4.90309e-07	10.6742
	88	Transcription factors	BZIP factors	NF-E2-like factor	Nfe2	NF-E2					29	1.96979	0.00108693	0.00641012
	89	Transcription factors	BZIP factors	Small Maf factor	Maff	hMafF					40	1.54025	0.00871912	0.0417791	47.191
	90	Transcription factors	BZIP factors	Small Maf factor	Mafk	P18, NFE2U					63	1.69586	0.000148441	0.00105592	56.1798
	91	Transcription factors	BZIP factors	TSC22	Tsc22d3	DIP, GILZ, TSC-22R, hDIP	1	31.661	0.0459783	0.322973					91.0112
	92	Transcription factors	C2H2 Zn finger factors	BCL6 factor	Bcl6	ZBTB27, LAZ3, BCL5, BCL6A	21	1.97992	0.00392348	0.0933517	59	1.46954	0.0046902	0.0245169	65.7303		▪		▪
	93	Transcription factors	C2H2 Zn finger factors	CTCF-like	Ctcf	FAP108, CFAP108					94	1.72705	2.66936e-06	2.63998e-05	55.618
	94	Transcription factors	C2H2 Zn finger factors	CTCF-like	Ctcfl	dJ579F20.2, BORIS, CT27					60	1.33847	0.0225995	0.0956667	15.7303
	95	Transcription factors	C2H2 Zn finger factors	Early growth response (EGR)	Egr1	TIS8, G0S30, NGFI-A, KROX-24, ZIF-268, AT225, ZNF225	7	2.42698	0.0305543	0.266439					100				▪
	96	Transcription factors	C2H2 Zn finger factors	Friend of GATA protein	Zfpm1	FOG1, FOG, ZNF89A, ZC2HC11A					31	1.58673	0.01327	0.0594566	14.6067				▪
	97	Transcription factors	C2H2 Zn finger factors	GFI1 factor	Gfi1b	ZNF163B					50	2.22803	1.28353e-06	1.34187e-05
	98	Transcription factors	C2H2 Zn finger factors	Gli-like	Gli3	PAP-A, PAPA, PAPA1, PAPB, ACLS, PPDIV					63	1.37654	0.0123868	0.0565729	11.236
	99	Transcription factors	C2H2 Zn finger factors	Hypermethylated in Cancer protein	Hic2	KIAA1020, HRG22, ZBTB30, ZNF907					10	2.46483	0.0123789	0.0565729	15.1685
	100	Transcription factors	C2H2 Zn finger factors	Ikaros	Ikzf1	hIk-1, LyF-1, Hs.54452, IKAROS, PPP1R92					76	1.80895	4.97818e-06	4.83795e-05	27.5281
	101	Transcription factors	C2H2 Zn finger factors	Kruppel-like	Klf3	BKLF					35	1.41599	0.0359808	0.144341	69.6629
	102	Transcription factors	C2H2 Zn finger factors	Kruppel-like	Klf4	EZF, GKLF					63	1.30907	0.028721	0.117961	85.9551
	103	Transcription factors	C2H2 Zn finger factors	Myelin transcription factor-related protein	Myt1l	KIAA1106, NZF1, ZC2HC4B, ZC2H2C2					15	1.95543	0.0162132	0.0708043
	104	Transcription factors	C2H2 Zn finger factors	REST	Rest	NRSF, XBR	18	1.70869	0.0255687	0.241677					53.9326
	105	Transcription factors	C2H2 Zn finger factors	Snail-like	Snai1	SNA, SLUGH2, SNAH, SNAIL1, SNAIL	19	2.12825	0.00279694	0.0776233					7.86517
	106	Transcription factors	C2H2 Zn finger factors	ZNF24-like factor	Zkscan1	KOX18, PHZ-37, ZSCAN33					31	1.92751	0.00103411	0.00615119	38.764
	107	Transcription factors	C2H2 Zn finger factors	ZNF37A-like	Wiz	ZNF803					65	1.37964	0.0108318	0.0504996	41.573
	108	Transcription factors	C2H2 Zn finger factors	ZNF37A-like	Zfp57	ZNF698, bA145L22, bA145L22.2	21	1.74253	0.0143287	0.16365					2.24719
	109	Transcription factors	C2H2 Zn finger factors	ZNF99-like	Wt1	WAGR, WIT-2, AWT1, NPHS4					31	1.4728	0.0305357	0.124672	9.55056
	110	Transcription factors	C2H2 Zn finger factors	ZSCAN5-like zinc finger factor	Zscan5b	ZNF495B, ZNF371	1	31.661	0.0459783	0.322973
	111	Transcription factors	E2F/FOX	E2F	E2f3						44	1.69821	0.00124226	0.00726409	41.0112
	112	Transcription factors	E2F/FOX	E2F	E2f4	E2F-4					84	3.17983	3.47e-17	1.49644e-15	31.4607
	113	Transcription factors	E2F/FOX	FOXA	Foxa1		23	2.12742	0.00112858	0.0432623	66	1.62245	0.000321253	0.00213139						▪
	114	Transcription factors	E2F/FOX	FOXA	Foxa2		24	1.7275	0.0104676	0.138897	87	1.69808	1.04128e-05	9.4537e-05
	115	Transcription factors	E2F/FOX	FOXF	Foxf1	FREAC1					62	1.61051	0.000556105	0.00355289
	116	Transcription factors	E2F/FOX	FOXG	Foxg1	HFK2, QIN, BF1, HFK1, HFK3, HBF-3					10	2.81155	0.0056508	0.0288819
	117	Transcription factors	E2F/FOX	FOXP	Foxp3	JM2, XPID, AIID, PIDX, DIETER, SCURFIN					51	1.40864	0.0155216	0.0682158					▪
	118	Transcription factors	Fork head / winged helix factors	Regulatory factor X (RFX)	Rfx2	FLJ14226	6	2.54937	0.035752	0.290899					12.9213
	119	Transcription factors	Grainyhead domain factors	GRH-like protein	Grhl3	SOM	6	6.0872	0.00072156	0.0331917
	120	Transcription factors	Heat shock factors	HSF	Hsf1	HSTF1	18	2.49502	0.000678004	0.0331917					26.4045
	121	Transcription factors	HMG domain	Group B	Sox2						85	1.60936	6.98398e-05	0.000541455
	122	Transcription factors	HMG domain	Group B	Sox3						14	2.2682	0.00666674	0.0333337
	123	Transcription factors	Homeo domain	Caudal type homeobox (CDX)	Cdx2		8	2.2109	0.0343773	0.290899
	124	Transcription factors	Homeo domain	DLX	Dlx1		1	31.661	0.0459783	0.322973
	125	Transcription factors	Homeo domain	HNF1-like factor	Hnf1a	HNF1, LFB1	7	3.49555	0.00532541	0.11375	15	2.00451	0.0134694	0.059576
	126	Transcription factors	Homeo domain	HNF1-like factor	Hnf1b	LFB3, VHNF1, HNF1beta, MODY5					30	1.68067	0.00740902	0.0362569
	127	Transcription factors	Homeo domain	HOX4	Hoxb4						47	1.73294	0.000598526	0.00378884	16.8539
	128	Transcription factors	Homeo domain	HOX9-13	Hoxa11						38	2.58343	1.03448e-06	1.1153e-05
	129	Transcription factors	Homeo domain	HOX9-13	Hoxa13		16	2.41228	0.00178227	0.0590403	44	1.77578	0.000554513	0.00355289
	130	Transcription factors	Homeo domain	HOX9-13	Hoxd13						25	2.9412	9.62442e-06	8.85447e-05
	131	Transcription factors	Homeo domain	ISL LIM homeobox	Isl1	Isl-1, ISLET1					76	1.66869	5.68707e-05	0.000456289
	132	Transcription factors	Homeo domain	Lhx-3-like factor	Lhx3						28	1.52389	0.0270841	0.111904
	133	Transcription factors	Homeo domain	MEIS	Meis1						84	1.78612	2.67824e-06	2.63998e-05	21.3483
	134	Transcription factors	Homeo domain	Nanog homeobox	Nanog	FLJ12581, FLJ40451					85	1.59215	9.64945e-05	0.000723709	5.05618
	135	Transcription factors	Homeo domain	NK-2.1	Nkx2-1	TTF-1, TTF1					36	1.84789	0.000871523	0.00532169
	136	Transcription factors	Homeo domain	Oct-3/4-like (POU5 )	Pou5f1	OCT3, Oct4, MGC22487					82	1.48208	0.000882615	0.00534214
	137	Transcription factors	Homeo domain	Oct-6-like (POU3 )	Pou3f1	OCT6, SCIP					17	1.64143	0.0427575	0.167629	8.98876
	138	Transcription factors	Homeo domain	Oct-6-like (POU3 )	Pou3f2	POUF3, BRN2, OCT7	11	2.44958	0.00760529	0.126975	29	1.727	0.00601134	0.0302761				▪
	139	Transcription factors	Homeo domain	ONECUT	Onecut1	HNF-6					46	1.45783	0.0124624	0.0565729						▪
	140	Transcription factors	Homeo domain	ONECUT	Onecut2	OC-2					58	1.52815	0.00236992	0.0130819	4.49438
	141	Transcription factors	Homeo domain	PDX	Pdx1	IDX-1, STF-1, PDX-1, MODY4	4	3.68907	0.0271925	0.253551										▪
	142	Transcription factors	Homeo domain	Prospero homeobox	Prox1		14	2.16837	0.00786571	0.126975	57	2.49483	8.60701e-09	1.23726e-07
	143	Transcription factors	Homeo domain	SATB	Satb1						71	1.84489	5.37858e-06	5.15447e-05	19.6629
	144	Transcription factors	Homeo domain	SIX1-like factor	Six2						74	2.23996	4.36879e-09	6.69882e-08
	145	Transcription factors	Homeo domain	Visual system homeobox (VSX)	Vsx2	RET1	9	3.16878	0.00317872	0.0791017					1.68539
	146	Transcription factors	Homeo domain	Zn finger E-box binding homeobox	Zeb1	BZP, ZEB, AREB6, NIL-2-A, Zfhep, Zfhx1a, FECD6	1	63.3835	0.0308915	0.266439					50.5618					▪
	147	Transcription factors	MADS box	Myocyte enhancer factor 2	Mef2a	RSRFC4, RSRFC9					12	2.34594	0.00914126	0.0432018	76.4045
	148	Transcription factors	MADS box	Myocyte enhancer factor 2	Mef2c		20	1.83493	0.0101416	0.137209	78	1.97398	1.97833e-07	2.35353e-06	43.8202
	149	Transcription factors	MADS box	Myocyte enhancer factor 2	Mef2d		8	2.19173	0.0358353	0.290899					71.3483
	150	Transcription factors	Other transcription factors	Nuclear factor I	Nfia	NFI-L, KIAA1439					55	1.88836	3.06322e-05	0.000260941	78.0899
	151	Transcription factors	Other transcription factors	Nuclear factor I	Nfib	NFI-RED, NFIB2, NFIB3	22	1.85169	0.0067077	0.122632	74	1.67873	5.90606e-05	0.000464004	96.0674
	152	Transcription factors	Other transcription factors	Nuclear factor I	Nfix	NF1A					21	1.61169	0.0313631	0.127297	93.2584
	153	Transcription factors	Other transcription factors	Two zinc-finger GATA factor	Gata1	ERYF1, NFE1, GATA-1, NF-E1					76	1.66638	5.91773e-05	0.000464004		▪			▪
	154	Transcription factors	Other transcription factors	Two zinc-finger GATA factor	Gata2	NFE1B					71	1.60094	0.00028235	0.00189147	21.9101
	155	Transcription factors	Other transcription factors	Two zinc-finger GATA factor	Gata3	HDR					92	2.34026	9.72451e-12	1.9735e-10	3.37079
	156	Transcription factors	Other transcription factors	Two zinc-finger GATA factor	Gata4						70	1.39208	0.00718941	0.0356884
	157	Transcription factors	Other transcription factors	Two zinc-finger GATA factor	Gata6						15	1.83541	0.0256317	0.106542	16.2921
	158	Transcription factors	p53 domain	p53-related factor	Trp63						53	1.77542	0.00017003	0.00117321	8.42697
	159	Transcription factors	Paired box	PAX-3/7	Pax3	HUP2					10	2.62675	0.00851468	0.0410848
	160	Transcription factors	Paired box	PAX-3/7	Pax7	Hup1	21	1.53846	0.0434441	0.322973	78	1.54285	0.000411134	0.00270174
	161	Transcription factors	Rel Homology Region	Early B-Cell Factor-related factor	Ebf1	OLF1, COE1					75	2.94044	4.894e-14	1.29879e-12	91.573
	162	Transcription factors	Rel Homology Region	Early B-Cell Factor-related factor	Ebf2	FLJ11500, COE2					68	1.42087	0.00529444	0.0272624	42.1348
	163	Transcription factors	Rel Homology Region	NFAT-related factor	Nfatc1	NF-ATC, NFATc, NFAT2	5	3.0622	0.0280111	0.255855					45.5056
	164	Transcription factors	Rel Homology Region	NF-kappaB p50 subunit-like factor	Nfkb1	KBF1, p105, NFKB-p50, p50, NF-kappaB, NFkappaB, NF-kB1					71	3.26658	2.46483e-15	8.50367e-14	59.5506				▪
	165	Transcription factors	Rel Homology Region	NF-kappaB p65 subunit-like factor	Rel	I-Rel, c-Rel					27	3.85836	4.38799e-08	5.71267e-07	30.8989
	166	Transcription factors	Runt domain	Core-binding factor subunit	Cbfb	PEBP2B					59	1.40088	0.0111082	0.0514408	48.3146
	167	Transcription factors	Runt domain	Core-binding factor subunit	Runx2	AML3, PEBP2A1, PEBP2aA1					75	1.62546	0.000130967	0.000941322	18.5393			▪
	168	Transcription factors	SMAD/NF1 DBD	Regulatory (R) Smads	Smad2	MADR2, JV18-1					69	1.4484	0.0033693	0.0181627	60.1124
	169	Transcription factors	STAT domain	STAT factor	Stat1	STAT91, ISGF-3					134	3.41507	1.44699e-28	1.42632e-26	84.8315				▪
	170	Transcription factors	STAT domain	STAT factor	Stat2	STAT113					88	2.73788	1.47215e-14	4.41646e-13	39.8876
	171	Transcription factors	STAT domain	STAT factor	Stat4						44	1.93244	0.000108333	0.000795207					▪
	172	Transcription factors	STAT domain	STAT factor	Stat5a	MGF	25	1.98296	0.00179688	0.0590403	65	1.34507	0.0169963	0.0732965	63.4831
	173	Transcription factors	STAT domain	STAT factor	Stat5b						70	2.39847	9.18068e-10	1.50825e-08	64.0449			▪	▪	▪
	174	Transcription factors	STAT domain	STAT factor	Stat6	D12S1644, IL-4-STAT					82	3.06474	4.89036e-16	1.87464e-14	89.3258			▪	▪
	175	Transcription factors	T Box factors	Brachyury-related	Tbx19	dj747L4.1, TPIT					25	1.84302	0.00493709	0.0256135
	176	Transcription factors	T Box factors	TBrain-related factor	Eomes	TBR2	20	1.91573	0.00664833	0.122632	95	2.61937	1.5429e-14	4.43584e-13
	177	Transcription factors	T Box factors	TBrain-related factor	Tbx21	TBLYM, T-bet					53	1.55537	0.0025191	0.0137951					▪
	178	Transcription factors	Tryptophan cluster	EHF-like	Elf5						75	2.01947	1.49929e-07	1.81493e-06
	179	Transcription factors	Tryptophan cluster	Interferon-regulatory	Irf1	MAR					31	1.80106	0.00266849	0.0144981	70.2247				▪
	180	Transcription factors	Tryptophan cluster	Interferon-regulatory	Irf3						77	3.75726	2.14506e-19	1.23341e-17	43.2584				▪
	181	Transcription factors	Tryptophan cluster	Interferon-regulatory	Irf4	LSIRF					133	3.11254	3.87388e-25	2.96998e-23	11.7978	▪		▪		▪
	182	Transcription factors	Tryptophan cluster	Interferon-regulatory	Irf5						115	4.40411	5.28075e-33	7.28743e-31	29.2135				▪
	183	Transcription factors	Tryptophan cluster	Interferon-regulatory	Irf8	IRF-8, ICSBP					124	3.9423	1.70275e-31	1.95817e-29	48.8764
	184	Transcription factors	Tryptophan cluster	Interferon-regulatory	Irf9						96	4.24196	6.34037e-27	5.46857e-25	32.5843				▪
	185	Transcription factors	Tryptophan cluster	Myb-like	Myb	c-myb					30	1.71077	0.005952	0.0301977	1.1236
	186	Transcription factors	Tryptophan cluster	Nuclear receptor corepressor	Ncor1	N-CoR, hCIT529I10, TRAC1, hN-CoR, KIAA1047, MGC104216, PPP1R109	24	1.94076	0.00281244	0.0776233	86	1.89953	2.23651e-07	2.61558e-06	93.8202		▪
	187	Transcription factors	Tryptophan cluster	REST corepressor	Rcor2						66	1.77073	3.4117e-05	0.000287082	24.7191
	188	Transcription factors	Tryptophan cluster	Spi-like	Spi1	PU.1, SPI-A, OF, SFPI1, SPI-1					173	3.64366	5.532e-39	1.90854e-36	34.2697
	189	Co-nodes	Cell cycle, cell division & DNA repair	Cell division cycle	Cdc73	parafibromin, FIHP					30	1.95565	0.00100257	0.0060154	70.7865
	190	Co-nodes	Cell cycle, cell division & DNA repair	Growth arrest and DNA damage inducible	Gadd45a	GADD45	1	31.661	0.0459783	0.322973					47.7528
	191	Co-nodes	Cell cycle, cell division & DNA repair	Structural maintenance of chromosomes	Smc5	KIAA0594	2	9.76201	0.0222061	0.218889					51.6854
	192	Co-nodes	Chromatin associated/remodellers	RB binding protein, chromatin remodeling factor	Rbbp4	RbAp48, NURF55, lin-53	5	5.40573	0.00320992	0.0791017	8	2.28692	0.0337541	0.136201	79.2135
	193	Co-nodes	Chromatin associated/remodellers	SWI/SNF related, matrix associated, actin dependent regulator of chromatin	Smarca4	hSNF2b, BRG1, BAF190, SNF2, SWI2, SNF2-BETA, SNF2LB, FLJ39786					77	1.36558	0.0076983	0.0374072	76.9663
	194	Co-nodes	Cohesin complex	Cell cycle checkpoint proteins (RAD)	Rad21	KIAA0078, hHR21, SCC1	27	1.91059	0.00202602	0.0635434	105	2.05634	3.14331e-10	5.42221e-09	80.8989
	195	Co-nodes	Cohesin complex	Stromal antigen	Stag1	SA-1, SCC3A, SA1	27	2.36456	9.61766e-05	0.00663619	90	2.16008	5.90687e-10	9.94084e-09	60.6742			▪
	196	Co-nodes	Cohesin complex	Stromal antigen	Stag2	SA-2, SCC3B, SA2	21	1.82704	0.00902808	0.128569	88	2.13835	1.37528e-09	2.20684e-08	78.6517
	197	Co-nodes	Cohesin complex	Structural maintenance of chromosomes	Smc1a	DXS423E, KIAA0178, SB1.8, Smcb					117	2.40805	4.03429e-15	1.2653e-13	74.7191
	198	Co-nodes	Cohesin complex	Structural maintenance of chromosomes	Smc3	HCAP, BAM, SMC3L1, bamacan					111	2.62686	1.05421e-16	4.27885e-15	61.7978
	199	Co-nodes	Critical region genes	DiGeorge syndrome critical region gene	Dgcr8	DGCRK6, Gy1, pasha	5	4.14017	0.00915844	0.128569					35.9551
	200	Co-nodes	Cytoskeleton components & regulators	Troponin	Tnni2	FSSV, DA2B	1	63.3835	0.0308915	0.266439
	201	Co-nodes	Developmental proteins	Developmental pluripotency associated	Dppa2	PESCRG1, CT100	24	1.87583	0.00419437	0.0964704	68	1.39855	0.00724464	0.0357057
	202	Co-nodes	Developmental proteins	Embryonic ectoderm development	Eed	WAIT-1, HEED	12	2.29165	0.00888646	0.128569	45	2.4071	6.64191e-07	7.51298e-06	40.4494
	203	Co-nodes	General transcription factors	General transcription factor IIE subunit	Gtf2e2	TFIIE-B, FE, TF2E2	11	1.92233	0.0352486	0.290899					29.7753
	204	Co-nodes	General transcription factors	TATA-box binding protein associated factor	Taf15	hTAFII68, RBP56, Npl3					20	1.80323	0.0133567	0.059459	69.1011
	205	Co-nodes	General transcription factors	TATA-box binding protein associated factor	Taf3	TAF140, TAFII140	16	1.63284	0.0463838	0.322973					36.5169
	206	Co-nodes	General transcription factors	TATA-box binding protein associated factor	Taf7l	CT40	28	2.8519	3.09105e-06	0.000304689								▪
	207	Co-nodes	General transcription factors	TATA-box binding protein associated factor	Taf9b	TAFII31L, DN-7, DN7, TFIID-31	3	3.89008	0.0472757	0.322973					22.4719
	208	Co-nodes	Interacting proteins	PAX interacting protein	Paxip1	CAGF29, CAGF28, TNRC2, PTIP					33	2.31557	3.60522e-05	0.000296143	25.2809
	209	Co-nodes	Interacting proteins	RING1 and YY1 binding protein	Rybp	YEAF1, AAP1, DEDAF	13	1.78212	0.0390935	0.306529					46.6292
	210	Co-nodes	Interacting proteins	TERF2 interacting protein	Terf2ip	RAP1	2	18.1342	0.00809693	0.126975					35.3933					▪
	211	Co-nodes	Junction proteins	Catenin	Ctnnb1	beta-catenin, armadillo					29	1.80105	0.00356281	0.0189103	97.7528
	212	Co-nodes	LIM domain proteins	LIM domain only	Lmo2	TTG2, RHOM2, RBTN2					89	2.55402	3.27484e-13	7.64479e-12	25.8427
	213	Co-nodes	Nucleoproteins	Transcription termination factor	Ttf1						50	1.59789	0.00199141	0.0112629	28.6517
	214	Co-nodes	Other co-nodes	Double homeobox B-like	Duxbl1						47	1.91966	7.54785e-05	0.000578669
	215	Co-nodes	Other co-nodes	WAPL cohesin release factor	Wapl	FOE					18	1.74959	0.0231791	0.0975218	82.0225
	216	Co-nodes	PHD domain proteins	MTF1-like	Mtf2	M96, PCL2, TDRD19A	18	2.16872	0.00292764	0.0776951	65	2.16534	1.03337e-07	1.27325e-06	30.3371
	217	Co-nodes	PHD domain proteins	PHD finger protein	Phf2	KIAA0662, JHDM1E, CENP-35, KDM7C	8	2.1729	0.0373345	0.296101					56.7416
	218	Co-nodes	Polycomb group (PcG) proteins	BMI1 proto-oncogene, polycomb ring finger	Bmi1	RNF51	6	2.87682	0.0219312	0.218889					66.8539					▪
	219	Co-nodes	Polycomb group (PcG) proteins	Chromobox	Cbx7		14	1.98832	0.0152954	0.170223	67	2.74763	1.35622e-11	2.6737e-10	33.7079
	220	Co-nodes	Polycomb group (PcG) proteins	Elongin BC and polycomb repressive complex associated protein	Epop	LOC100170841, PRR28	22	2.17281	0.00109927	0.0432623	61	1.59671	0.000738649	0.0045916	2.80899
	221	Co-nodes	Polycomb group (PcG) proteins	Enhancer of zeste polycomb repressive complex subunit	Ezh2	EZH1, ENX-1, KMT6, KMT6A					100	2.40709	3.1875e-13	7.64479e-12	24.1573
	222	Co-nodes	Polycomb group (PcG) proteins	Polycomb group ring finger	Pcgf1	NSPC1, RNF68, MGC10882					81	2.20734	1.61615e-09	2.53441e-08	12.3596
	223	Co-nodes	Polycomb group (PcG) proteins	Polycomb group ring finger	Pcgf2	MEL-18					43	2.47054	6.26961e-07	7.21005e-06	10.1124
	224	Co-nodes	Polycomb group (PcG) proteins	SUZ12 polycomb repressive complex subunit	Suz12	JJAZ1, KIAA0160, CHET9	22	1.81989	0.00803392	0.126975	102	2.40426	2.02833e-13	5.18352e-12	62.3596
	225	Co-nodes	PR domain	PR/SET domain	Prdm16	MEL1, PFM13, KIAA1675, MGC166915, KMT8F					63	1.52934	0.00159202	0.00923105	23.5955			▪
	226	Co-nodes	RNA binding & RB motif proteins	Negative elongation factor complex member	Nelfa	NELF-A	20	1.82147	0.0108711	0.141529					23.0337
	227	Co-nodes	RNA binding & RB motif proteins	Negative elongation factor complex member	Nelfb	KIAA1182, NELF-B	15	2.01293	0.0112846	0.144192					57.8652
	228	Co-nodes	RNA binding & RB motif proteins	Negative elongation factor complex member	Nelfe	RD, D6S45, NELF-E, RDP	18	1.76467	0.0195762	0.207809					39.3258
	229	Co-nodes	Transcriptional coregulators	Chromobox	Cbx5	HP1Hs-alpha, HP1, HP1-ALPHA	3	6.35728	0.0144676	0.16365					88.2022
	230	Co-nodes	Transcriptional coregulators	CREB regulated transcription coactivator	Crtc2	TORC2					25	1.68702	0.0129066	0.0582061	44.382
	231	Co-nodes	Transcriptional coregulators	Groucho/TLE/Grg	Tle3	ESG, ESG3, KIAA1547, HsT18976, GRG3	18	1.77296	0.0188172	0.202872	72	1.95839	7.0831e-07	7.88281e-06	87.6404		▪
	232	Co-nodes	Transcriptional coregulators	Lin-9 DREAM MuvB core complex component	Lin9	TGS					39	7.55592	1.03284e-18	5.48198e-17	19.1011
	233	Co-nodes	Transcriptional coregulators	Mediator complex subunit	Med24	TRAP100, KIAA0130, DRIP100, CRSP100, MED5					61	1.58621	0.000853594	0.00525875	37.0787
	234	Co-nodes	Transcriptional coregulators	SIN3 transcription regulator	Sin3b	KIAA0700					8	2.66867	0.0163161	0.0708057	61.236
	235	Co-nodes	Transcriptional coregulators	Suppressor of Ty homolog superfamily	Supt5		17	1.9688	0.00903617	0.128569					79.7753
	236	Co-nodes	Zinc finger proteins	Zinc finger CCCH-type containing	Zc3h11a	KIAA0663	17	2.39804	0.00139785	0.0507639	55	2.12605	1.46097e-06	1.50458e-05	62.9213
	237	Co-nodes	Zinc finger proteins	Zinc finger MIZ-type containing	Zmiz1	RP11-519K18.1, KIAA1224, FLJ13541, hZIMP10, Zimp10, MIZ	22	2.56702	0.000132008	0.00828048					89.8876
	238	Co-nodes	Zinc finger proteins	Zinc finger MYND-type containing	Zmynd11	BS69					11	1.93604	0.037871	0.150178	75.8427
